# Supplementary material for: Global prevalence of norovirus gastroenteritis after emergence of the GII.4 Sydney 2012 variant: a systematic review and meta-analysis
Source: Frontiers journal article supplement (doi:10.3389/fpubh.2024.1373322), 2024-06-27
Supplement: Data_Sheet_1.PDF [file Data_Sheet_1.PDF]

### S 1.1: Forest Plot Of China And Neighboring Countries

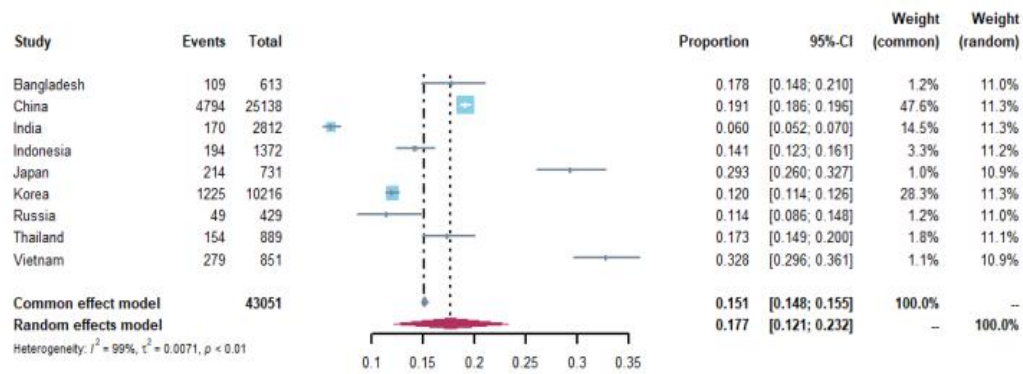

### S 1.2: Sensitivity Analysis Chart Of China And Neighboring Countries

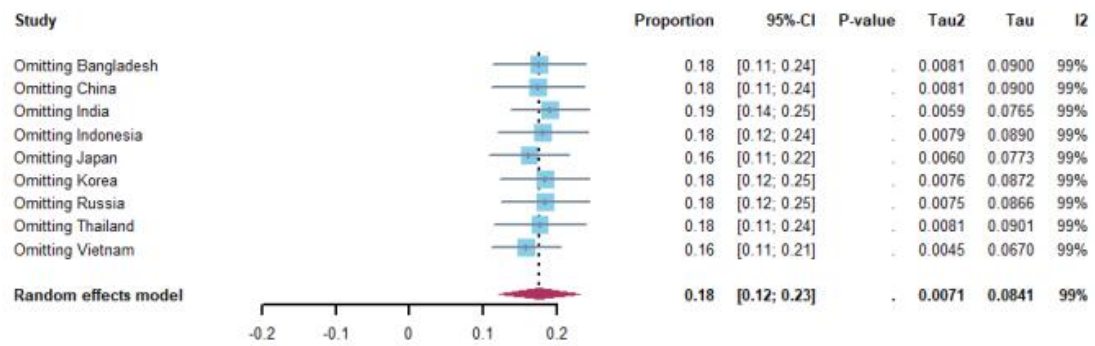

### S 1.3: Funnel Plot Of China And Neighboring Countries

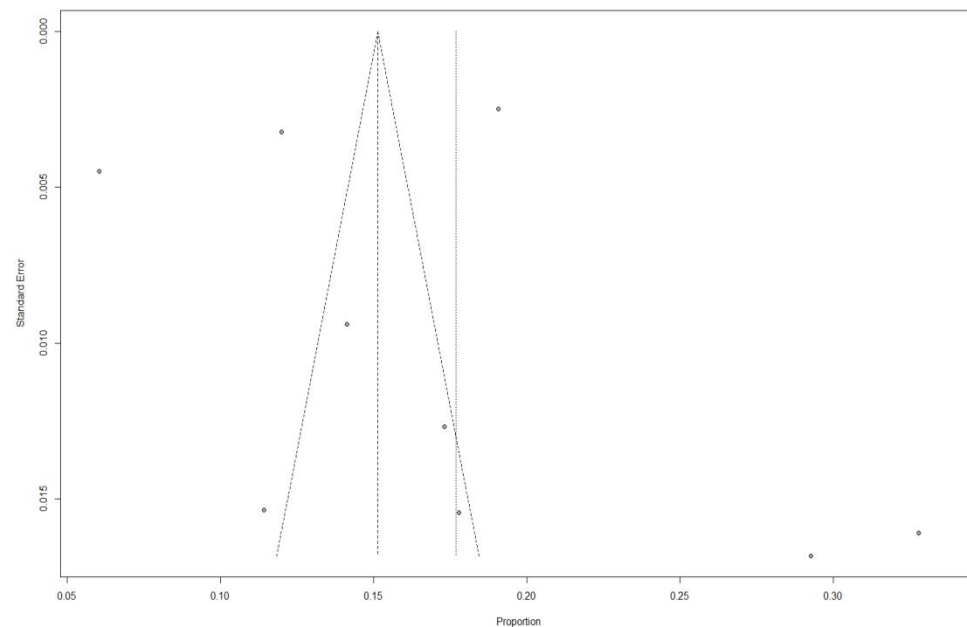

### S 2.1: Forest Plot Of Chinese Mainland and Taiwan

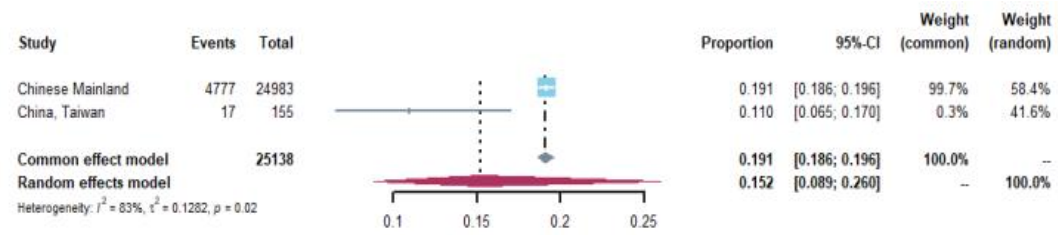

## S 2.2: Sensitivity Analysis Chart Of Chinese Mainland and Taiwan

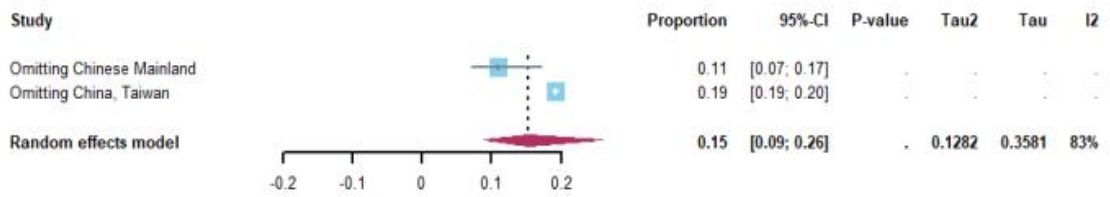

## S2.3: Funnel Plot Of Chinese Mainland and Taiwan

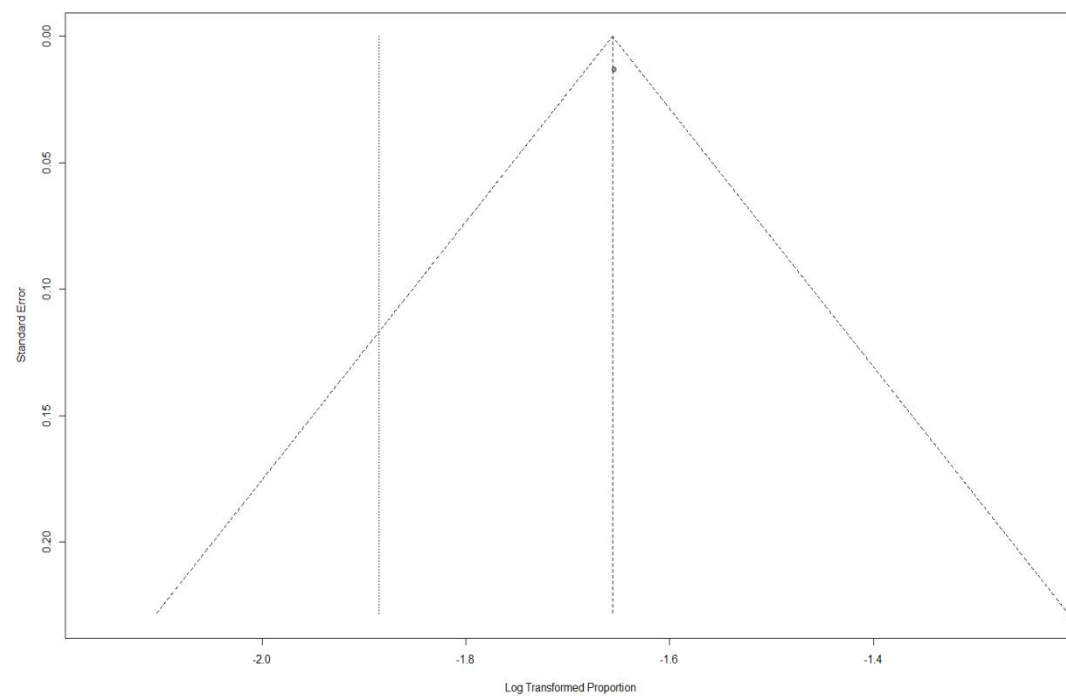

S 3.1: Forest Plot Of Developed And Developing Countries

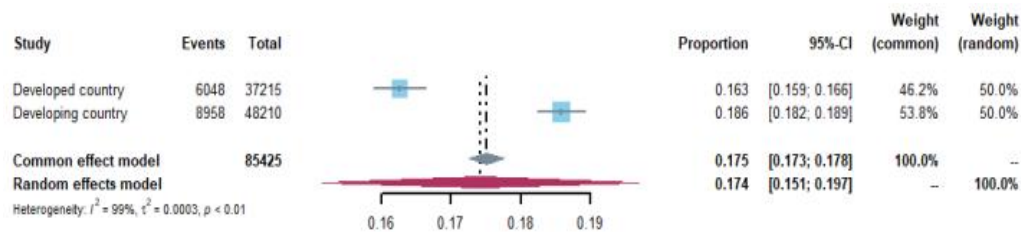

S 3.2: Sensitivity Analysis Chart Of Developed And Developing Countries

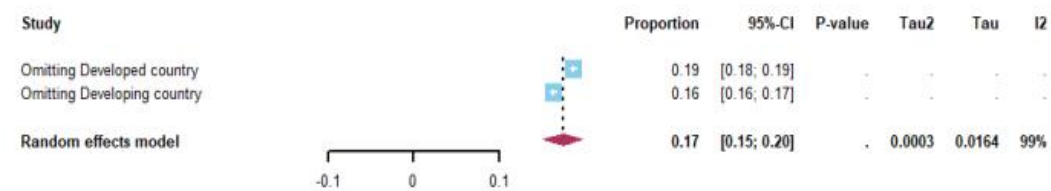

S 3.3: Funnel Plot Of Developed And Developing Countries

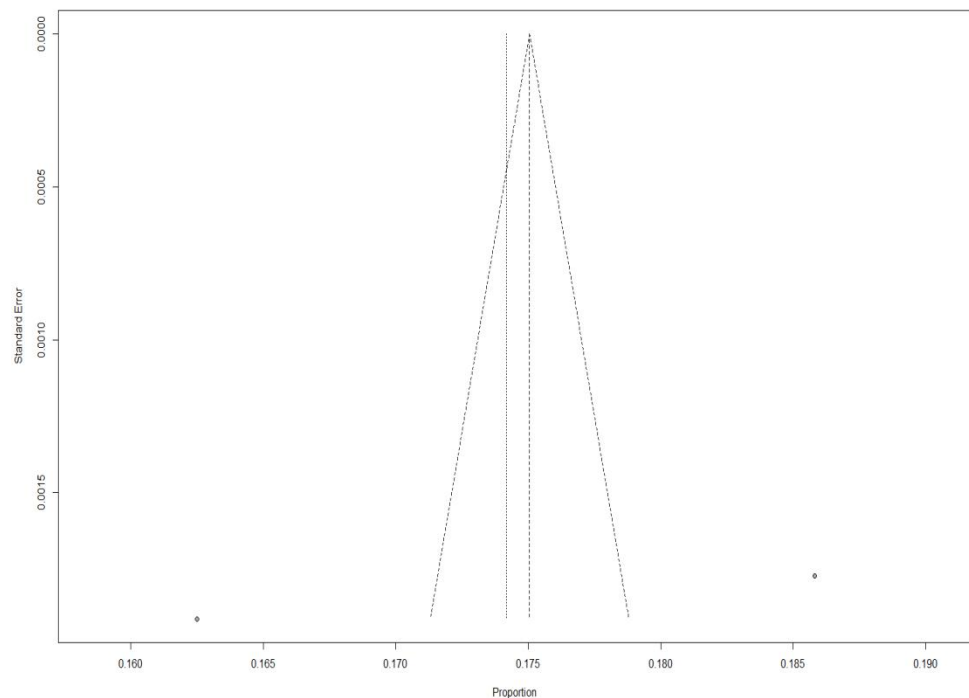

S 4.1: Forest Plot Of Countries In The Southern Hemisphere And Northern Hemisphere

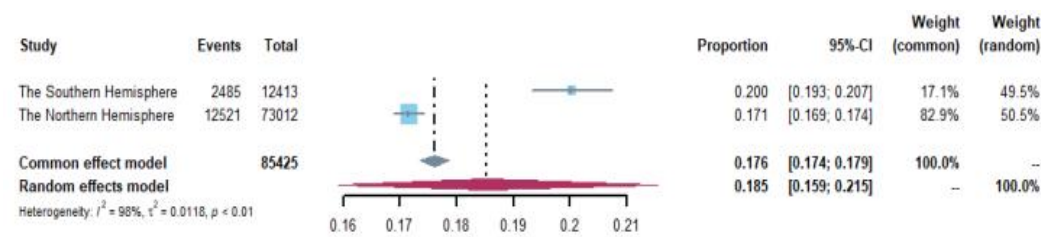

S 4.2: Sensitivity Analysis Chart Of Countries In The Southern Hemisphere And Northern Hemisphere

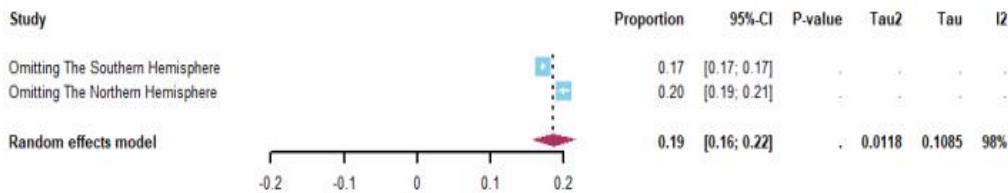

S 4.3: Funnel Plot Of Countries In The Southern Hemisphere And Northern Hemisphere

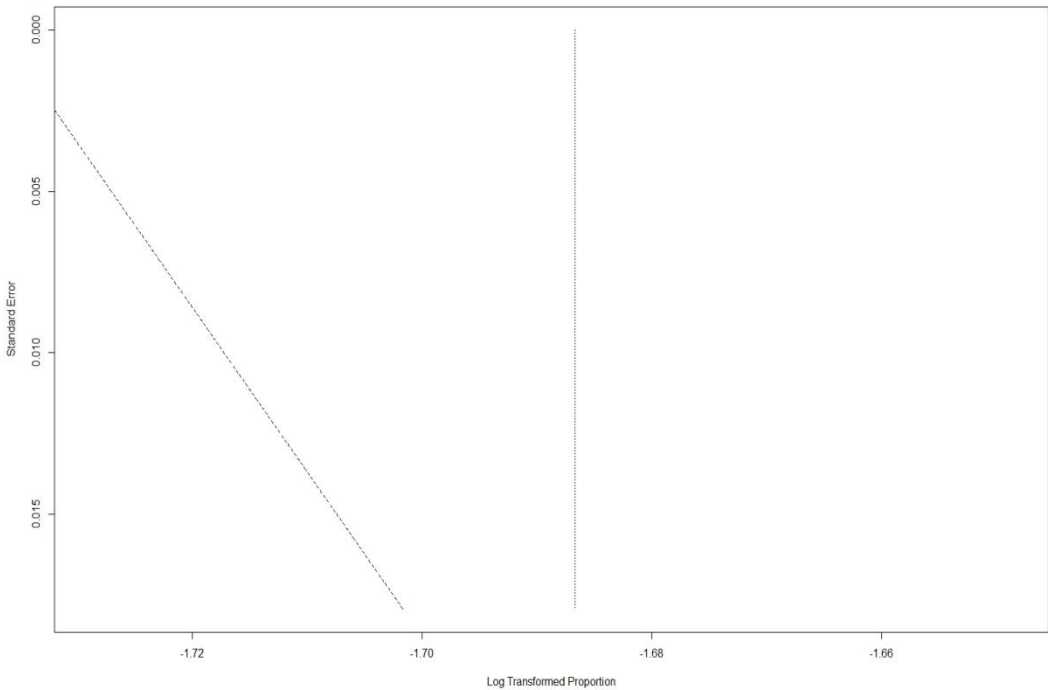

### S 5.1: Forest Plot Of Different Months

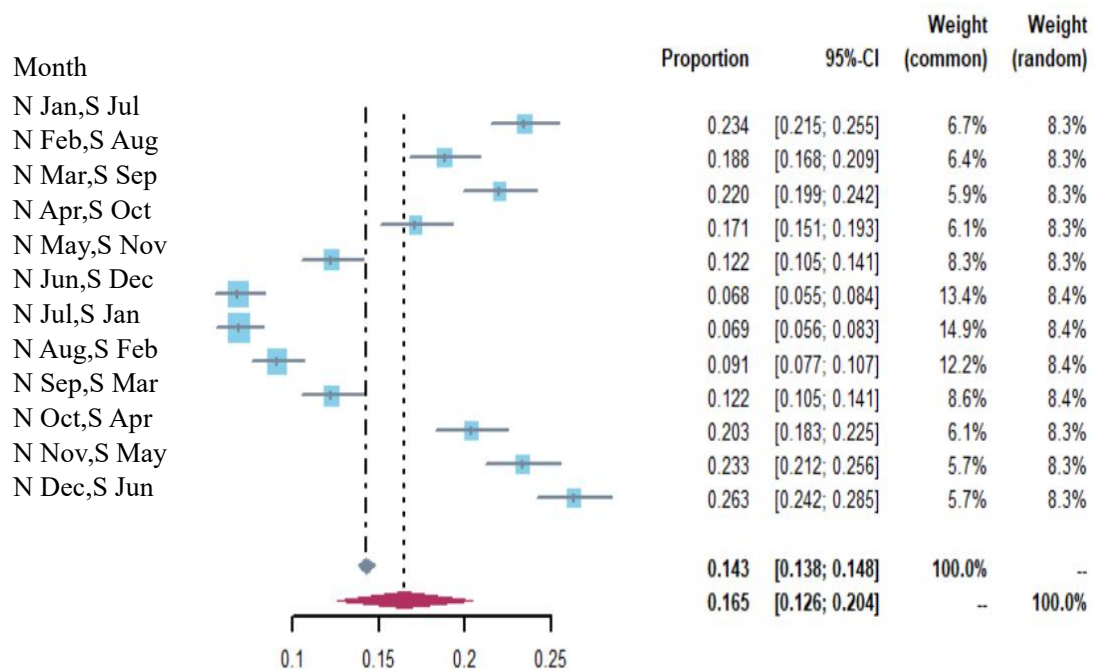

(N: the Northern Hemisphere; S: the Southern Hemisphere)

### S 5.2: Sensitivity Analysis Chart Of Different Months

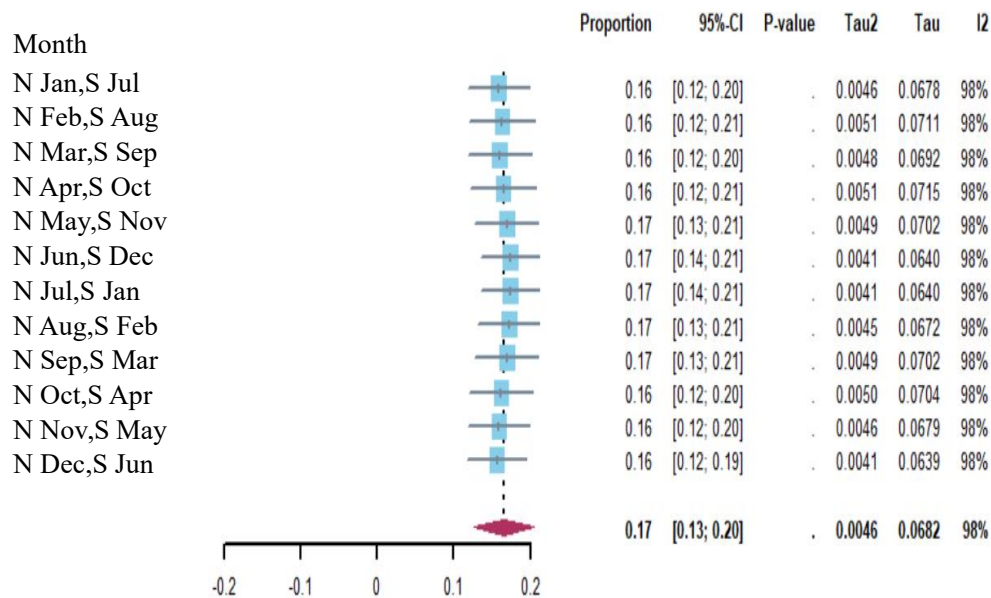

(N: the Northern Hemisphere; S: the Southern Hemisphere)

### S 5.3: Funnel Plot Of Different Months

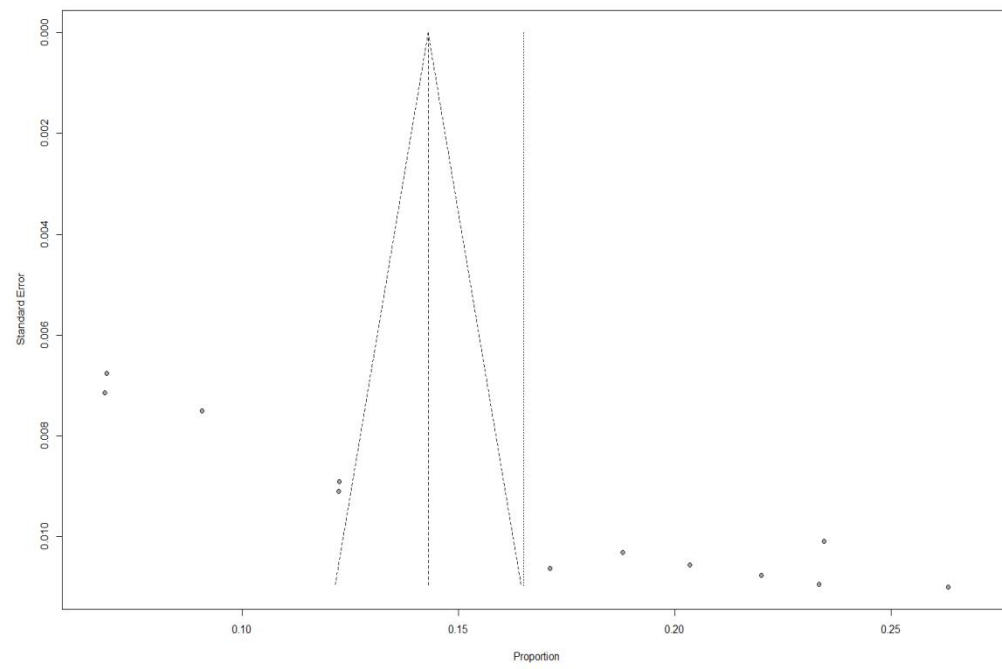

S 6.1: Forest Plot Of Different Seasons

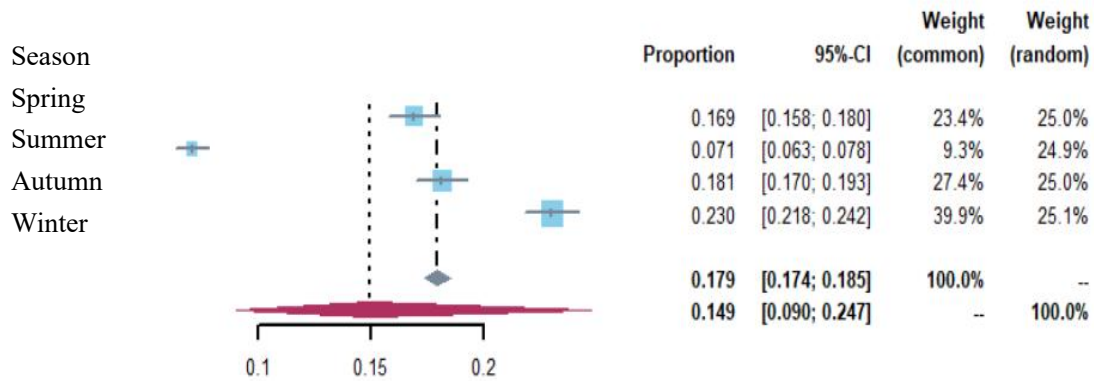

(Spring:the Northern Hemisphere March-May , the Southern Hemisphere September-November;  
Summer:the Northern Hemisphere June-August, the Southern Hemisphere December-February;  
Autumn:the Northern Hemisphere September-November, the Southern Hemisphere March-May;  
Winter:the Northern Hemisphere December-February, the Southern Hemisphere June-August)

S 6.2: Sensitivity Analysis Chart Of Different Seasons

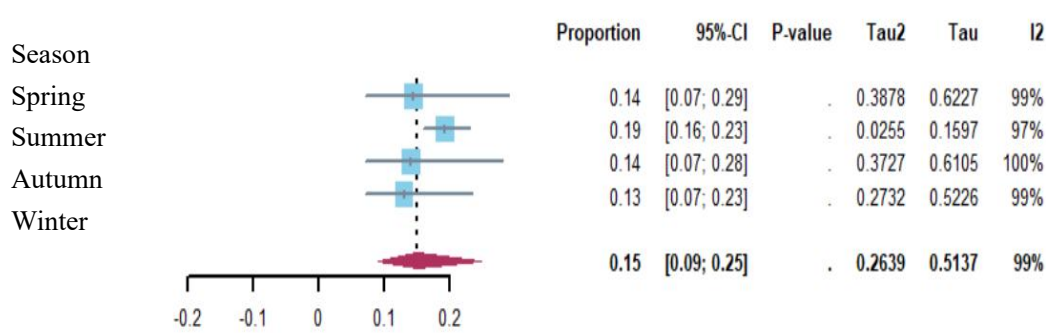

S 6.3: Funnel Plot Of Different Seasons

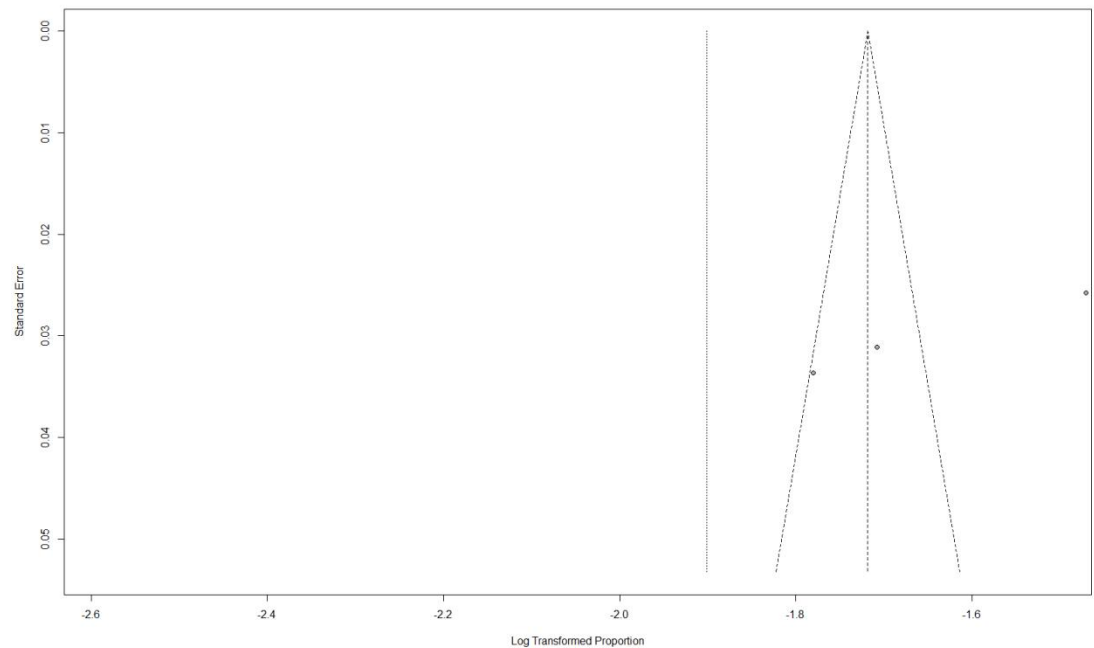

S 7.1: Forest Plot Of Warm And Cold Months

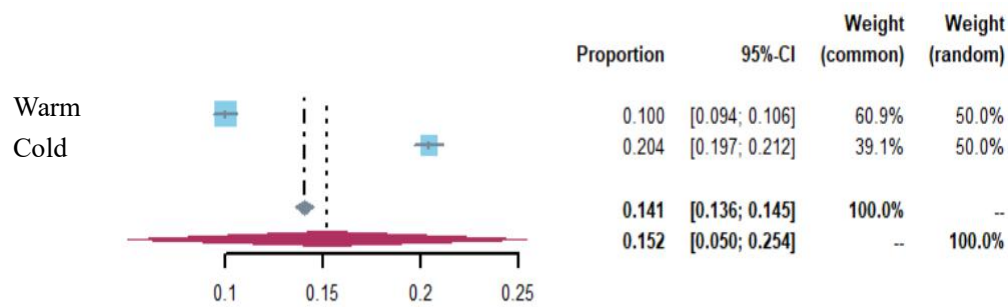

(Warm:the Northern Hemisphere April-September , the Southern Hemisphere October-March;  
Cold:the Northern Hemisphere October-March, the Southern Hemisphere April-September)

S 7.2: Sensitivity Analysis Chart Of Warm And Cold Months

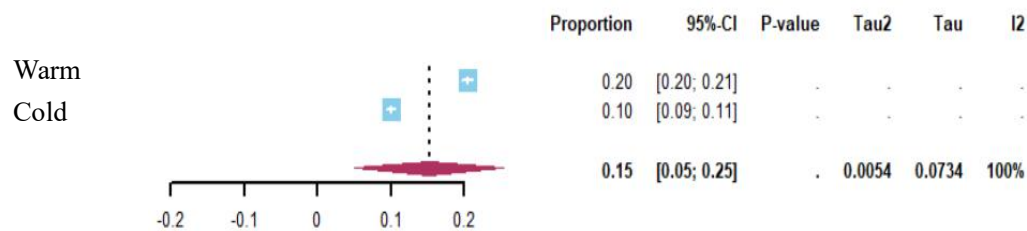

S 7.3: Funnel Plot Of Warm And Cold Months

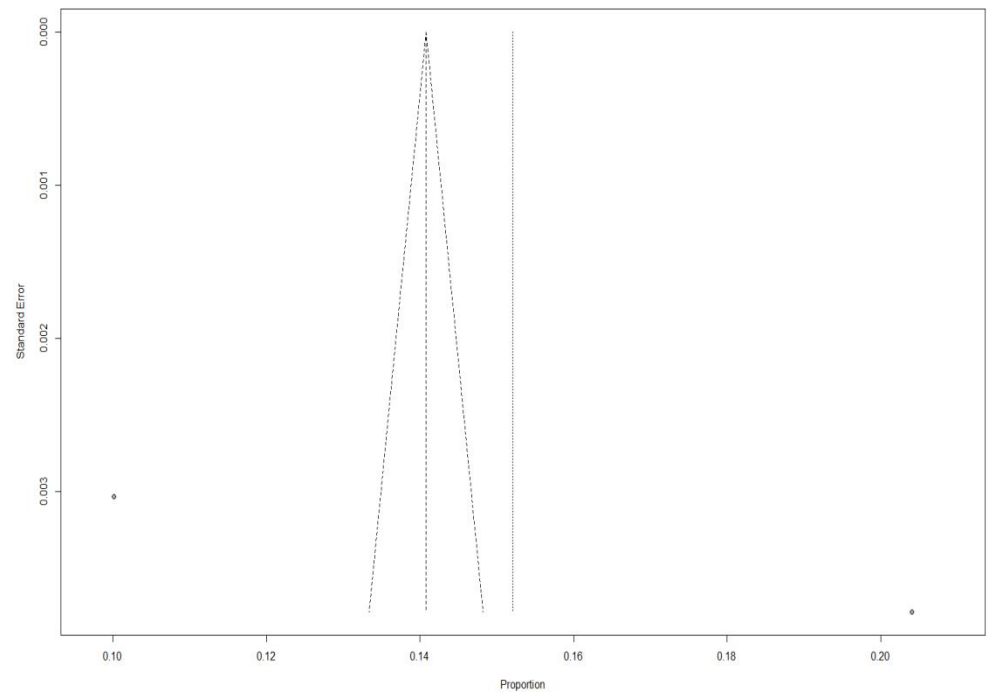



S 8.1: Forest Plot Of Different Ages (1)

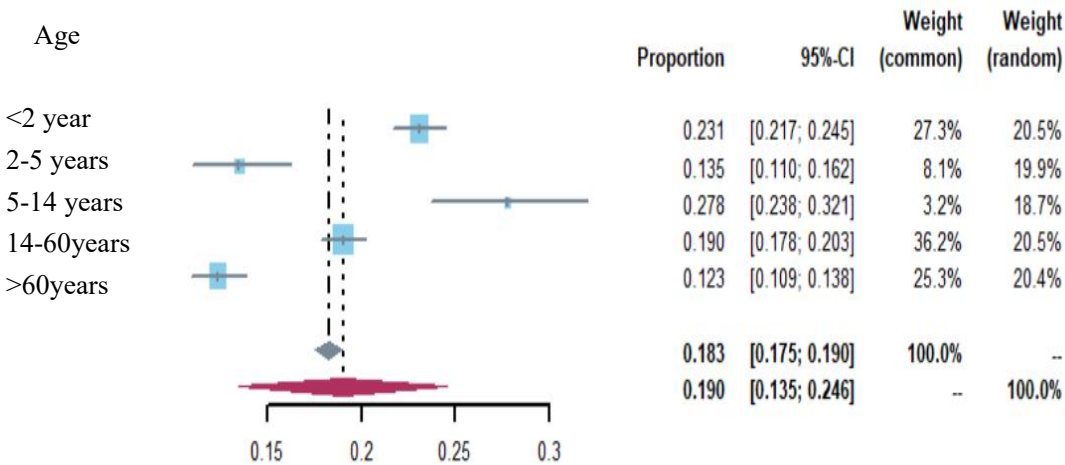

S 8.2: Sensitivity Analysis Chart Of Different Ages (1)

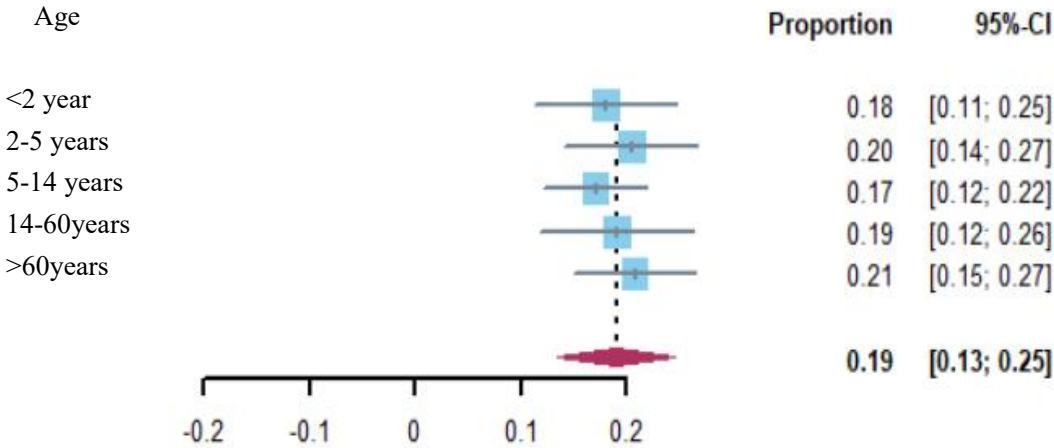

S 8.3: Funnel Plot Of Different Ages (1)

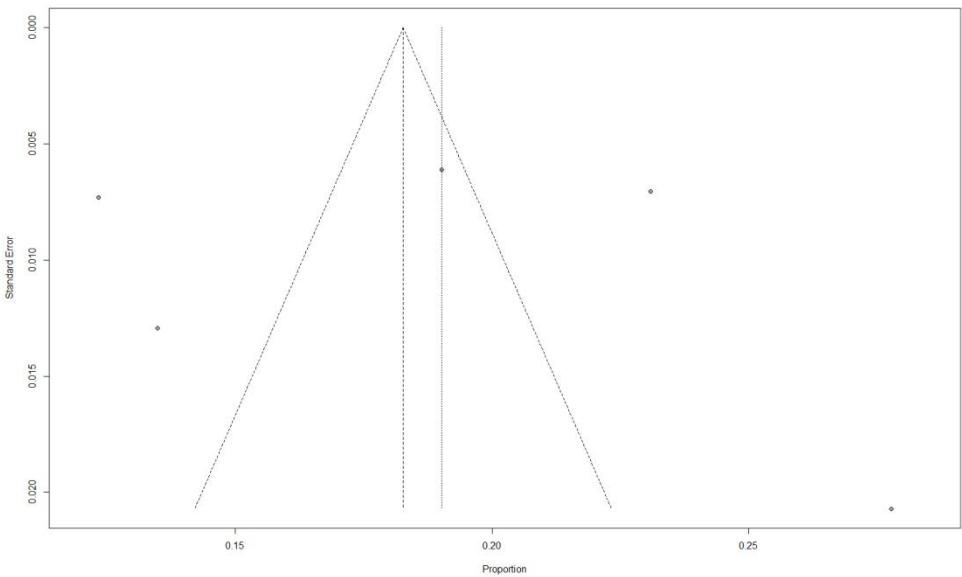

S 9.1: Forest Plot Of Different Ages ( 2 )

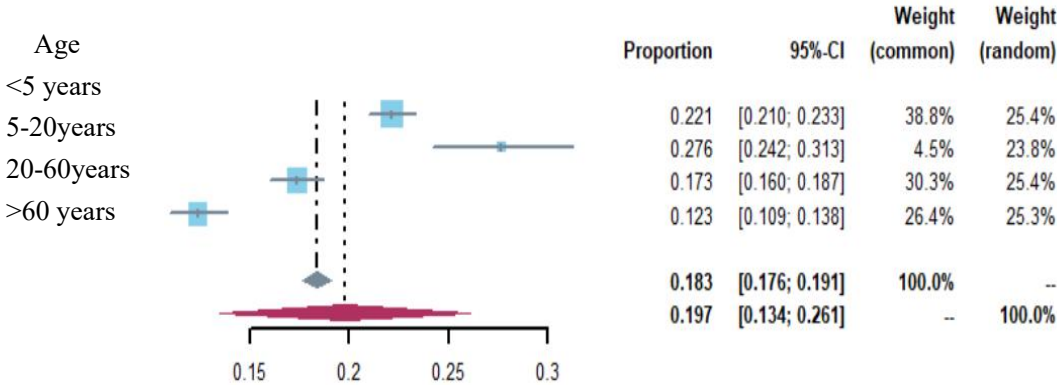

S 9.2: Sensitivity Analysis Chart Of Different Ages ( 2 )

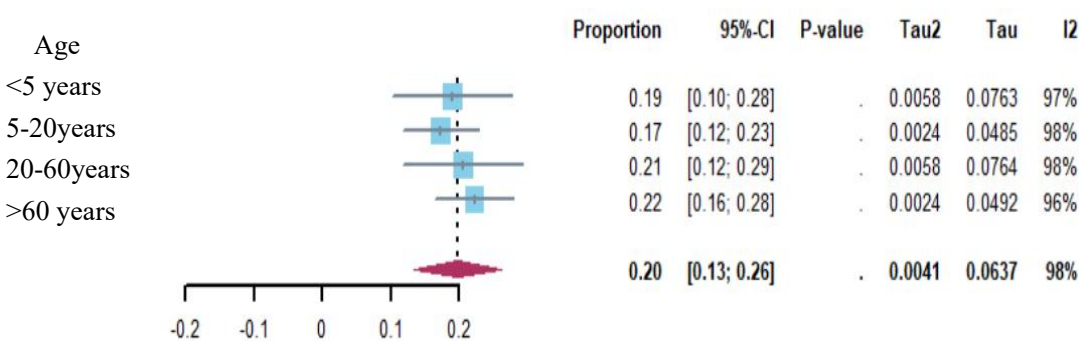

S 9.3: Funnel Plot Of Different Ages ( 2 )

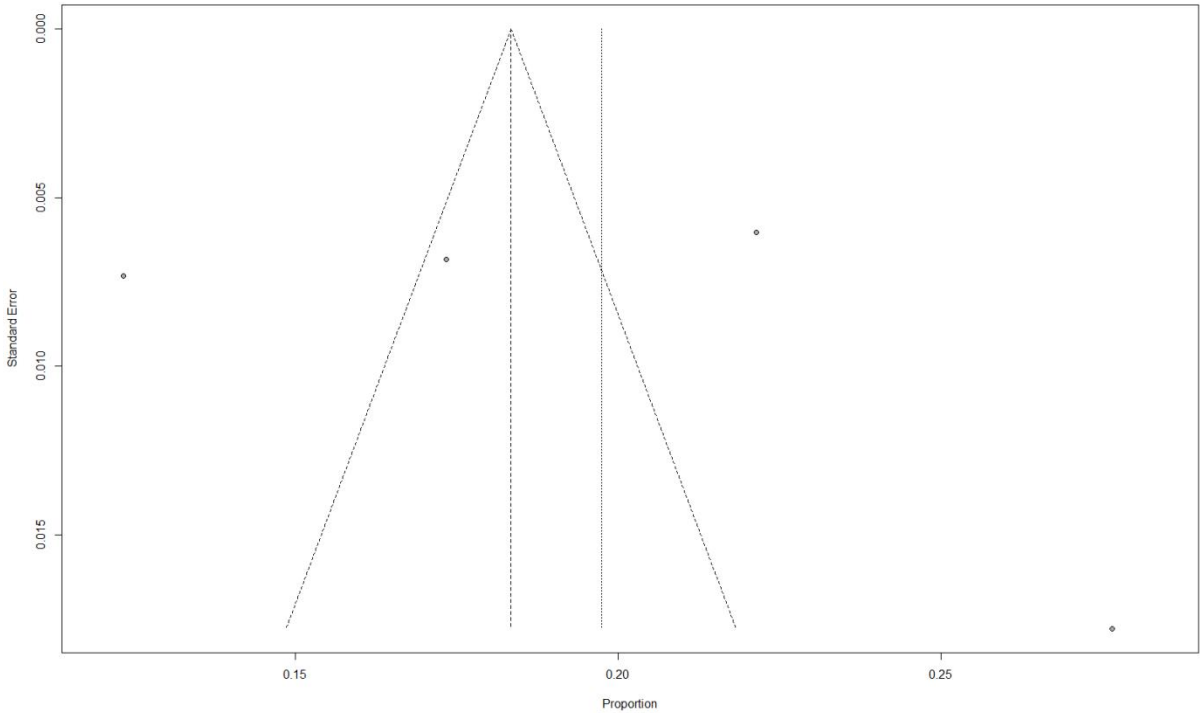

S 10.1: Forest Plot Of Sex

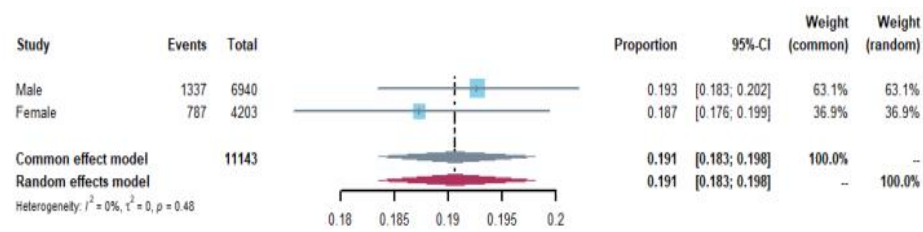

S 10.2: Sensitivity Analysis Chart Of Sex

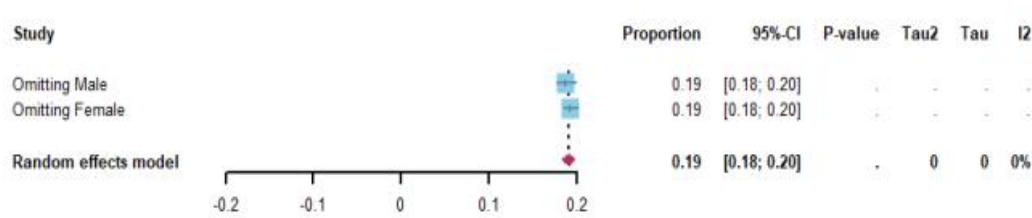

S 10.3: Funnel Plot Of Sex

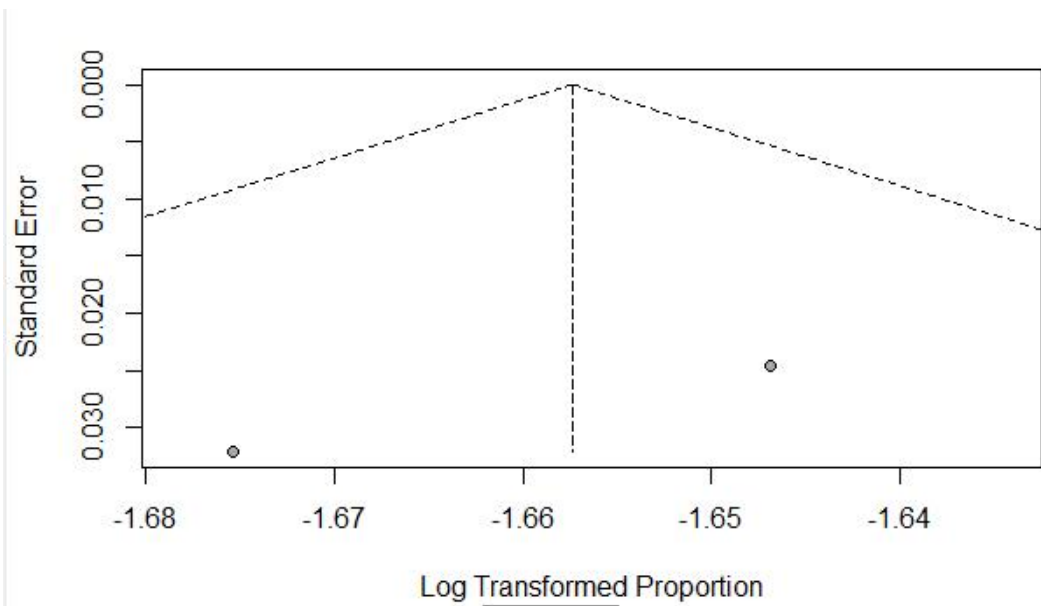

### S 11.1: Sensitivity Analysis Chart Of Different Years

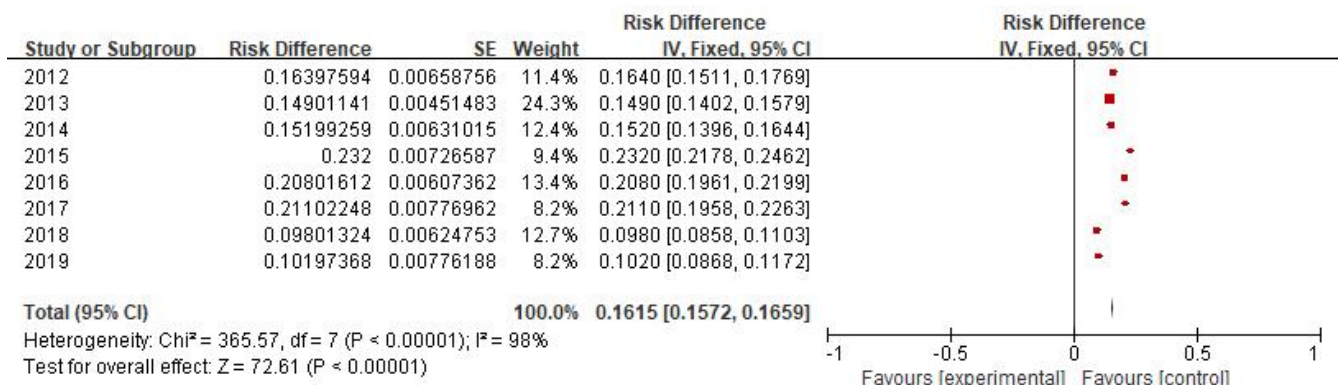

### S 11.2: Funnel Plot Of Different Years

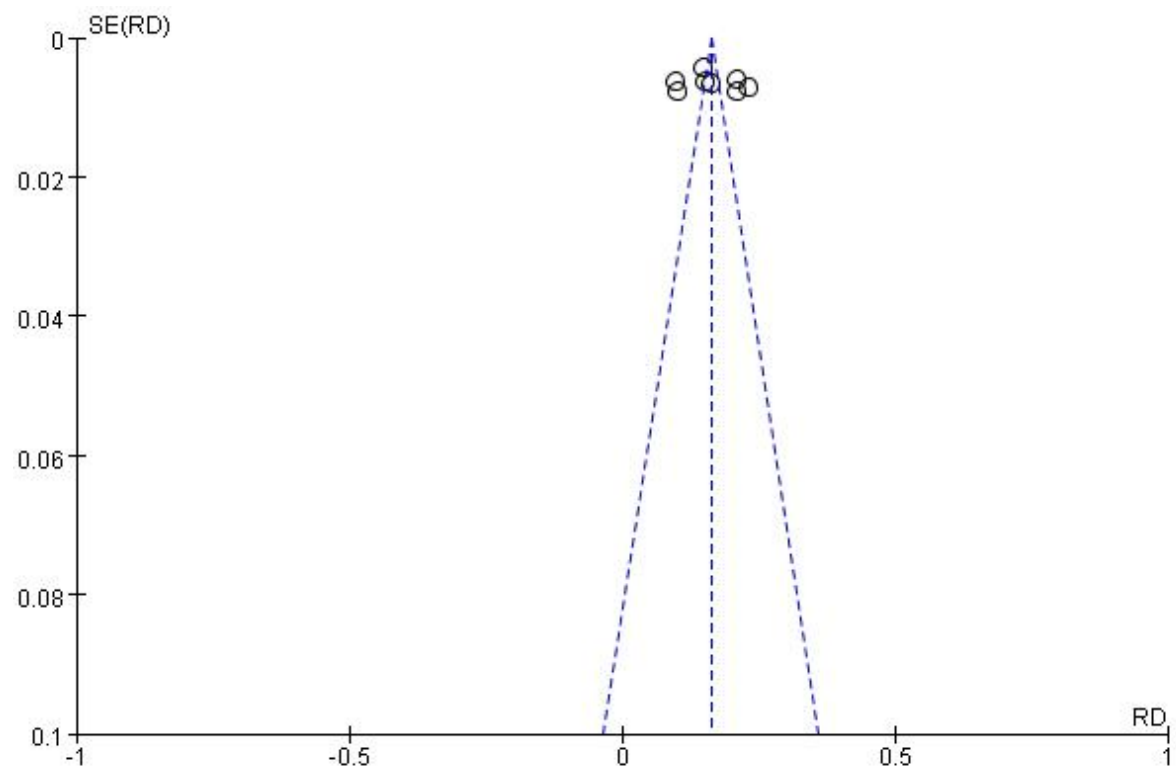

S 12: the sample size calculation of each sub-group

| Characteristics | Cases of studies | Pooled prevalence(%)<br>(95% CI) | Included sample size | required sample size |
|-----------------|------------------|----------------------------------|----------------------|----------------------|
| Age groups (1)  | 2082             | 19.0(14.3-23.7)                  | 10598                | 262—409              |
| Age groups (2)  | 2003             | 19.7(14.5-24.9)                  | 10168                | 345—391              |
| Sex             | 2124             | 19.1(18.3-19.8)                  | 11120                | 260—407              |
| Years           | 4695             | 16.0(15.6-16.4)                  | 29344                | 323—504              |
| Month           | 2929             | 16.5(12.5-20.5)                  | 17752                | 311—486              |
| Season          | 3068             | 16.3(8.8-23.7)                   | 18822                | 316—493              |
| Temperature     | 3296             | 15.2(5.0-25.4)                   | 21684                | 343—536              |
| Counties        | 15089            | 19.0(16.7-21.4)                  | 79416                | 262—409              |
